# Supplementary material for: Pricing Decisions of Competing Tobacco Enterprises with Online Channel
Source: Hindawi journal article supplement (doi:10.1155/2015/424181), 2015-01-01
Supplement: f1 [file 424181.f1.pdf]

## Appendix

### Proof of Lemma 1.

Retailer  $r$ 's reaction function given wholesale prices  $w_i$  can be derived from the First Order Conditions (FOC) of Eq.(3) .

According to equation (3) we can get:

$$\frac{\partial \Pi_r}{\partial p_i} = \frac{1 - \theta - 2p_i + 2\theta p_{3-i} + w_i - \theta w_{3-i}}{1 - \theta^2} = 0, \quad i = 1, 2. \quad (4)$$

For which the Hessian matrix is negative due to  $\frac{\partial \Pi_r}{\partial p_1^2} = -\frac{2}{1 - \theta^2} < 0$  and

$$\frac{\partial^2 \Pi_r}{\partial p_1^2} \frac{\partial^2 \Pi_r}{\partial p_2^2} - \frac{\partial^2 \Pi_r}{\partial p_1 \partial p_2} \frac{\partial^2 \Pi_r}{\partial p_2 \partial p_1} = \frac{4}{(1 - \theta^2)} > 0 \text{ for any } [0, 1), \text{ satisfying the second order condition}$$

for the maximum.

From Eq. (4), retailer  $r$ 's reaction functions can be derived:

$$p_i(w_i, w_{3-i}) = \frac{1 + w_i}{2}, \quad i = 1, 2. \quad (5)$$

By the reaction function (5), the manufacturer's wholesale price can be reached from the following FOC of the manufacturers  $i$ 's profit maximization problems.

$$\frac{\partial \Pi_i}{\partial w_i} = \frac{1 - \theta - 2w_i + \theta w_{3-i}}{2 - 2\theta^2} = 0 \quad i = 1, 2. \quad (6)$$

By solving Eq. (6) = 0 results into the following whole prices

$$w_i^{MA*} = \frac{1 - \theta}{2 - \theta} \quad i = 1, 2,$$

and the corresponding retail prices can obtain from Eq. (5) :

$$p_i^{MA*} = \frac{3 - 2\theta}{2(2 - \theta)} \quad i = 1, 2.$$

Furthermore, it is easy to get the optimal profits of manufacturer  $i$  as follows:

$$\Pi_1^{MA*} = \Pi_2^{MA*} = \frac{1 - \theta}{2(2 - \theta)^2(1 + \theta)}.$$

### Proof of Lemma 2.

According to equation (3) we can get:

$$\frac{\partial \Pi_r}{\partial p_i} = \frac{1 - \theta - 2p_i + 2\theta p_{3-i} + \theta p_{ol} + w_i - \theta w_{3-i}}{1 - \theta^2} = 0, \quad i = 1, 2. \quad (7)$$

It is easily established that the second order Hessian matrix of this problem is negative definite due

$$\text{to } \frac{\partial \Pi_r}{\partial p_1^2} = -\frac{2}{1 - \theta^2} < 0 \quad \text{and} \quad \frac{\partial^2 \Pi_r}{\partial p_1^2} \frac{\partial^2 \Pi_r}{\partial p_2^2} - \frac{\partial^2 \Pi_r}{\partial p_1 \partial p_2} \frac{\partial^2 \Pi_r}{\partial p_2 \partial p_1} = \frac{4}{(1 - \theta^2)^2} > 0 \quad \text{for any } [0, 1),$$

satisfying the second order condition for the maximum.

By Eq. (7) we get: the reflect functionretailersof sales can be:

$$p_i(w_i, w_{3-i}) = \frac{1 - \theta + \theta p_{ol} + w_i - \theta w_{3-i}}{2(1 - \theta)}, \quad i = 1, 2. \quad (8)$$

By Eq. (8) the manufacturer's wholesale price Nash equation, we can get the following equation to allow maximize manufacturer  $i$ 's profit.

$$\frac{\partial \Pi_1}{\partial w_1} = \frac{1 - \theta + 2\theta p_{ol} - 2w_1 + \theta w_2}{2 - 2\theta^2} = 0, \quad (9)$$

$$\frac{\partial \Pi_2}{\partial w_2} = \frac{1 - \theta + \theta p_{ol} + \theta w_1 - 2w_2}{2 - 2\theta^2} = 0, \quad (10)$$

$$\frac{\partial \Pi_1}{\partial p_{ol}} = \frac{4(\theta - 1 + \theta^2)p_{ol} + (1 - \theta)(2\eta_1 + 2\theta - 2\eta_1\theta + 2\theta w_1 + \theta w_2)}{2(1 - \theta)^2(1 + \theta)} = 0. \quad (11)$$

By coupling the equation (9), (10), (11) = 0, we can get the wholesale price and the price of direct sales channels of  $m_1$  :

$$w_1^{MB*} = \frac{(1 - \theta)(8 - (4 - 8\eta_1)\theta - (3 + 6\eta_1)\theta^2 - (3 + 2\eta_1)\theta^3)}{2(8 - 8\theta - 15\theta^2 + 5\theta^3 + 4\theta^4)},$$

$$w_2^{MB*} = \frac{(1 - \theta)(4 - 2(3 - \eta_1)\theta + (1 - 2\eta_1)\theta^2)}{8 - 16\theta + \theta^2 + 4\theta^3} \text{ and}$$

$$p_{ol}^{MB*} = \frac{(1 - \theta)(2 + \theta)(7\theta - 5\theta^2 + 2\eta_1(2 - 3\theta + \theta^2))}{2(8 - 8\theta - 15\theta^2 + 5\theta^3 + 4\theta^4)}.$$

Therefore, the price of two products sold by retailer R can be obtained from (8):

$$p_1^{MB*} = \frac{24 - 4(7 - 4\eta_1)\theta - (15 + 22\eta_1)\theta^2 + (7 + 2\eta_1)\theta^3 + (6 + 4\eta_1)\theta^4}{4(8 - 8\theta - 15\theta^2 + 5\theta^3 + 4\theta^4)} \text{ and}$$

$$p_2^{MB*} = \frac{24 - 4(7 - 3\eta_1)\theta - 2(11 + 6\eta_1)\theta^2 + (19 - 6\eta_1)\theta^3 + (1 + 6\eta_1)\theta^4}{4(8 - 8\theta - 15\theta^2 + 5\theta^3 + 4\theta^4)}.$$

Manufacturers optimal profit function can be expressed as:

$$\begin{aligned}\Pi_1^{MB*} &= \frac{64 - 192\theta + 392\theta^2 - 560\theta^3 + 111\theta^4 + 250\theta^5 - 81\theta^6 - 20\theta^7 + 4\eta_1^2(1 - \theta)^2}{8(1 + \theta)^2(8 - 16\theta + \theta^2 + 4\theta^3)^2} \\ \Pi_2^{MB*} &= \frac{(1 - \theta)(4 - 2(3 - \eta_1)\theta + (1 - 2\eta_1)\theta^2)^2}{2(1 + \theta)(8 - 16\theta + \theta^2 + 4\theta^3)^2}.\end{aligned}$$

### Proof of Lemma 3.

Here we omit the proof process due to the symmetry with Lemma 2.

### Proof of Proposition 1.

When  $\eta_1 = \eta_2 = \eta$ , under channel MD

$$\begin{aligned}w_1^{MD*} &= w_2^{MD*} = \frac{2(1 - \theta)^2(2 - (1 - 3\eta)\theta)}{8 - 16\theta - 11\theta^2 + 13\theta^3}, \\ p_1^{MA*} &= p_2^{MA*} = \frac{12 - 2(13 - 7\eta)\theta + (11 - 24\eta)\theta^2 + (1 + 10\eta)\theta^3}{16 - 32\theta - 22\theta^2 + 26\theta^3}, \\ D_1^{MA*} &= D_2^{MA*} = \frac{4 - 2(5 - \eta)\theta + (5 - 2\eta)\theta^2}{16 - 32\theta - 22\theta^2 + 26\theta^3}, \\ \Pi_r^{MD*} &= \frac{(4 - 2(5 - \eta)\theta + (5 - 2\eta)\theta^2)^2}{2(1 + \theta)(8 - 24\theta + 13\theta^2)^2}, \\ \Pi_1^{MD*} &= \Pi_2^{MD*} = \frac{(8 - 40\theta + 111\theta^2 - 178\theta^3 + 132\theta^4 - 35\theta^5 + 2\eta^2(1 - \theta)^2)(8 - 24\theta + 23\theta^2 - 8\theta^3) + 2\eta\theta(32 - 132\theta + 193\theta^2 - 120\theta^3 + 27\theta^4)}{(1 + \theta)^2(8 - 24\theta + 13\theta^2)^2}.\end{aligned}$$

To make sure that  $D_i^*, D_{oi}^*, w_i^*, p_i^*, p_{oi}^*$  is not negative, we can get that  $w_i^{MD*}$  has the tightest constraints. To make sure  $w_i^{MD*} \geq 0$ , which  $\frac{2(1 - \theta)^2(2 - (1 - 3\eta)\theta)}{8 - 16\theta - 11\theta^2 + 13\theta^3} \geq 0$ , we can get  $\theta < \frac{2}{13}(6 - \sqrt{10})$ .

### Proof of Proposition 2 and 3

When  $\eta_1 = \eta_2 = \eta$ , to make sure that  $D_i^*, D_{oi}^*, w_i^*, p_i^*, p_{oi}^*$  is not negative, we can get that

$p_{oi}^{MB*} \geq 0$  has the tightest constraints

$$\frac{(1-\theta)(8-(4-8\eta)\theta-(3+6\eta)\theta^2-(3+2\eta)\theta^3)}{2(8-8\theta-15\theta^2+5\theta^3+4\theta^4)} \geq 0 \text{ and } \frac{(1-\theta)(4-2(3-\eta)\theta+(1-2\eta)\theta^2)}{8-16\theta+\theta^2+4\theta^3} \geq 0.$$

We can get real root  $\theta_1 < \frac{113}{200}$ .
